# Supplementary material
Source: publisher figshare collection journal article supplement (https://frontiersin.figshare.com/ndownloader/files/28946094)
Supplement: Supplementary file 1 [file 28946094]

## Sheet: Sheet1
Table S1 The erosion rate, Excess topography and Hillslope
Sample ID	Longitude (°E）	Latitude(°N）	Erosion rate (mm/ka)	Excess topography (km3）	Hillslope(°)	River	References
mj-01	103.753	32.2584	285.29	5.03	15.065	岷江	Godard et al., 2010
mj-02	103.546	32.3397	184.37	3.31	44.4209	岷江	Godard et al., 2010
mj-03	103.517	32.3793	119.83	3.01	35.091	岷江	Godard et al., 2010
mj-04	103.197	32.1814	212.54	4.08	22.674	岷江	Godard et al., 2010
mj-05	103.277	32.2944	186.49	3.69	49.8865	岷江	Godard et al., 2010
mj-06	103.29	32.32	100.91	3.28	28.3551	岷江	Godard et al., 2010
mj-07	103.259	32.0633	128.03	3.26	20.9145	岷江	Godard et al., 2010
ddh-01	102.073	30.0789	383.75	14.71	18.5492	大渡河	Ouimet et al., 2009
ddh-02	102.058	30.1035	481.92	13.6	28.3771	大渡河	Ouimet et al., 2010
ddh-03	102.182	30.2275	272.67	11.64	15.8932	大渡河	Ouimet et al., 2011
ddh-04	102.127	30.3762	451.45	18.03	0	大渡河	Ouimet et al., 2012
ddh-05	101.743	30.68	387.67	11.3	0	大渡河	Ouimet et al., 2013
ddh-06	101.719	30.9535	209.3	6.78	28.214	大渡河	Ouimet et al., 2014
ddh-07	101.868	31.0289	298.02	10.92	12.7824	大渡河	Ouimet et al., 2015
ddh-08	102.279	31.0201	133.29	4.5	32.3199	大渡河	Ouimet et al., 2016
ddh-09	102.048	31.2931	96.46	5.47	13.2311	大渡河	Ouimet et al., 2017
ddh-10	102.05	31.4192	134.07	3.12	13.0737	大渡河	Ouimet et al., 2018
ddh-11	101.998	31.7498	137.53	7.75	29.5537	大渡河	Ouimet et al., 2019
ylj-01	100.72	31.4502	90.81	1.33	12.1487	雅砻江	Ouimet et al., 2020
ylj-02	101.38	30.3203	40.45	0.01	3.05562	雅砻江	Ouimet et al., 2021
ylj-03	101.422	30.3093	57.86	0.04	9.43938	雅砻江	Ouimet et al., 2022
ylj-04	101.521	30.3302	19.34	0.07	10.567	雅砻江	Ouimet et al., 2023
ylj-05	101.529	30.269	26.62	0.1	17.4381	雅砻江	Ouimet et al., 2024
ylj-06	101.51	30.1424	37.64	0.66	8.58596	雅砻江	Ouimet et al., 2025
ylj-07	101.359	30.0598	42.55	0.44	7.6014	雅砻江	Ouimet et al., 2026
ylj-08	101.306	30.0502	100.03	1.25	10.8944	雅砻江	Ouimet et al., 2027
ylj-09	101.219	30.0403	78.47	3.07	8.58596	雅砻江	Ouimet et al., 2028
ylj-10	101.389	29.931	24.09	0.73	16.0021	雅砻江	Ouimet et al., 2029
ylj-11	101.541	29.8895	17.57	0.53	27.2468	雅砻江	Ouimet et al., 2030
ylj-12	101.58	29.98	38.45	1.01	19.4909	雅砻江	Ouimet et al., 2031
ylj-13	101.518	29.7236	47	1.79	6.84887	雅砻江	Ouimet et al., 2032
ylj-14	101.094	29.7678	124.44	6.37	4.82452	雅砻江	Ouimet et al., 2033
ylj-15	100.985	30.0423	82.33	5.35	25.4247	雅砻江	Ouimet et al., 2034
ylj-16	101.434	29.51	182.18	4.16	6.09397	雅砻江	Ouimet et al., 2035
ylj-17	101.236	29.4275	173.49	10.51	0	雅砻江	Ouimet et al., 2036
ylj-18	101.227	29.4147	318.86	9.89	51.3216	雅砻江	Ouimet et al., 2037
ylj-19	101.68	28.6105	258.03	11.97	29.9134	雅砻江	Ouimet et al., 2038
ylj-20	101.874	28.4006	342.84	12.65	16.9291	雅砻江	Ouimet et al., 2039
jsj-01	98.3896	31.5854	37.12	3.77	30.6522	金沙江	Henck et al., 2011
jsj-02	98.5599	31.7512	101.17	4.89	15.4549	金沙江	Henck et al., 2012
jsj-03	98.5952	31.6862	94.35	5.08	10.1566	金沙江	Henck et al., 2013
jsj-04	99.0042	29.7562	32.72	3.95	13.7853	金沙江	Henck et al., 2014
jsj-05	100.02	26.9088	16.52	1.81	22.473	金沙江	Henck et al., 2015
lcj-01	97.3446	30.8493	100.9	2.87	26.5019	澜沧江	Henck et al., 2011
lcj-02	97.1621	31.1496	130.47	1.21	29.6407	澜沧江	Henck et al., 2012
lcj-03	97.1786	31.1506	106.63	1.14	18.1163	澜沧江	Henck et al., 2013
lcj-04	98.8087	28.5565	430.07	8.12	9.17871	澜沧江	Henck et al., 2014
lcj-05	99.0345	27.5682	129.58	3.75	8.49292	澜沧江	Henck et al., 2015
lcj-06	99.0877	27.354	108.04	2.63	9.58158	澜沧江	Henck et al., 2016
lcj-07	99.36	27.0557	32.08	0.5	34.0335	澜沧江	Henck et al., 2017
lcj-08	99.2954	25.4244	136.1	1.14	28.8513	澜沧江	Henck et al., 2018
nj-01	97.2804	30.0746	93.36	6.25	59.9263	怒江	Henck et al., 2011
nj-02	97.3211	30.1948	19.57	0.42	9.12933	怒江	Henck et al., 2012
nj-03	97.0699	30.5985	20.18	0.03	0.764586	怒江	Henck et al., 2013
nj-04	97.7024	29.8559	26.99	0.99	2.60245	怒江	Henck et al., 2014
nj-05	97.7727	29.7293	37.14	1.57	1.40963	怒江	Henck et al., 2015
nj-06	97.8373	29.6805	32.01	1.96	13.9837	怒江	Henck et al., 2016
nj-07	97.9191	29.5461	22.64	2.93	15.1215	怒江	Henck et al., 2017
nj-08	98.6353	28.018	80.11	7.95	15.9097	怒江	Henck et al., 2018
nj-09	98.7974	27.5805	96.32	7.48	37.3072	怒江	Henck et al., 2019
nj-10	98.8902	27.2297	69.1	6.95	12.6922	怒江	Henck et al., 2020
nj-11	98.9001	26.481	100.62	8.25	17.3967	怒江	Henck et al., 2021
